# Supplementary material
Source: Frontiers journal article supplement (https://www.frontiersin.org/articles/503453)
Supplement: Image_6.PDF [file Image_6.PDF]

A

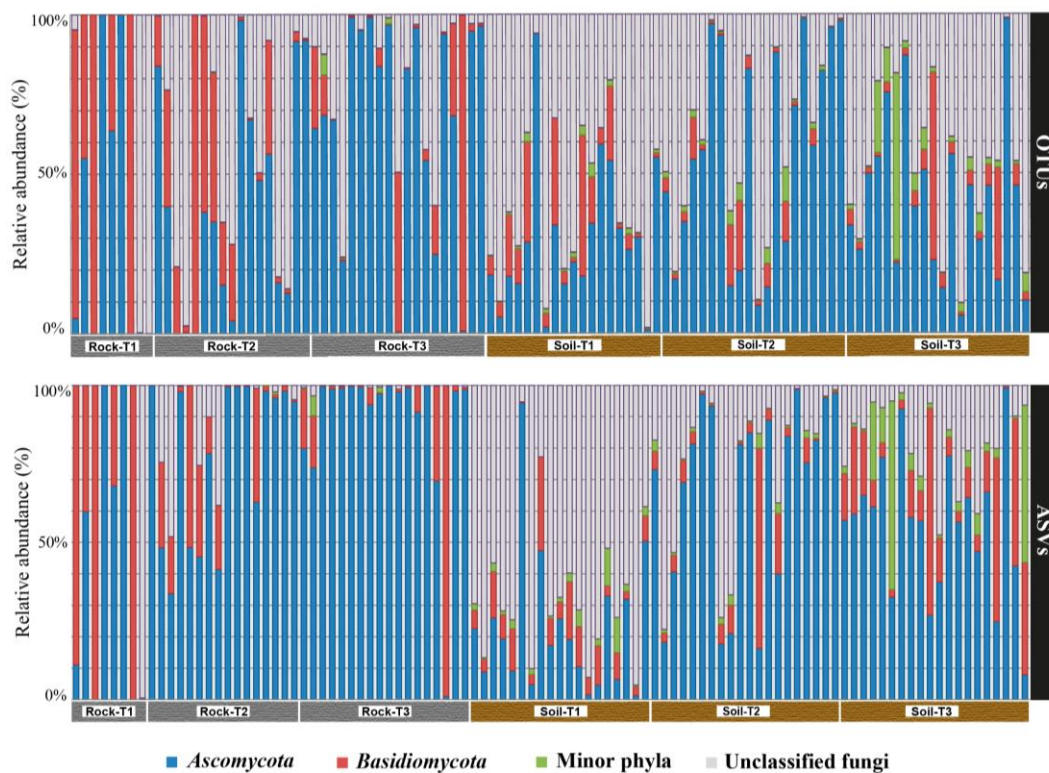

B

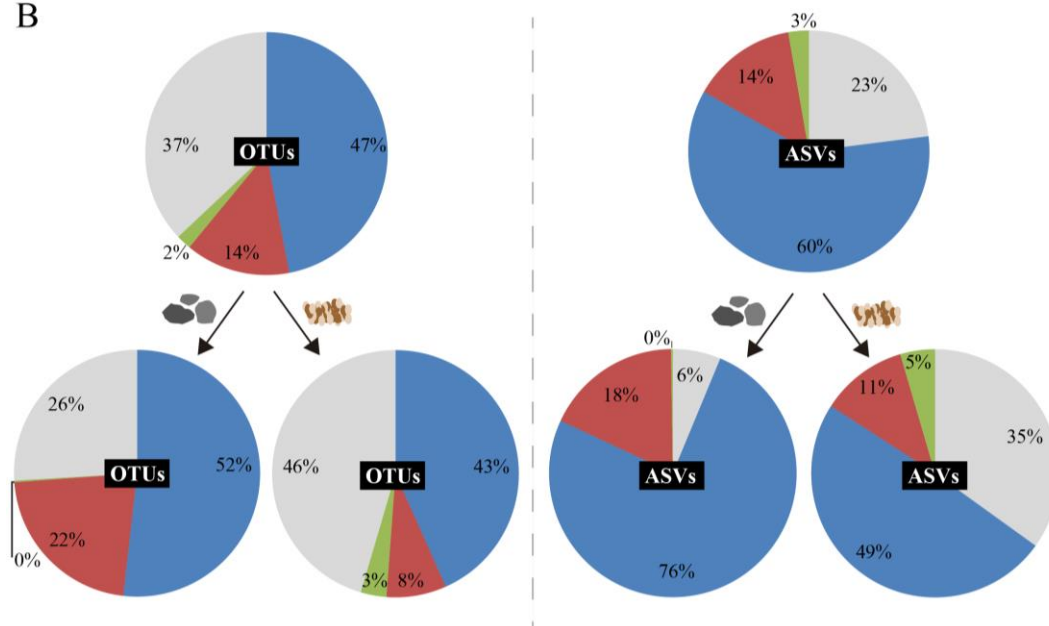

**Supplementary Figure S6.** Relative abundance of fungal phyla per sample calculated with OTU and ASV data and arranged by substrate type (rocks, soil) and successional stage (A). Proportion of each fungal phylum based on OTUs and ASVs for the entire chronosequence, and considering the two substrate types independently (B).
