# Supplementary material
Source: Frontiers journal article supplement (https://www.frontiersin.org/articles/503453)
Supplement: Image_15.PDF [file Image_15.PDF]

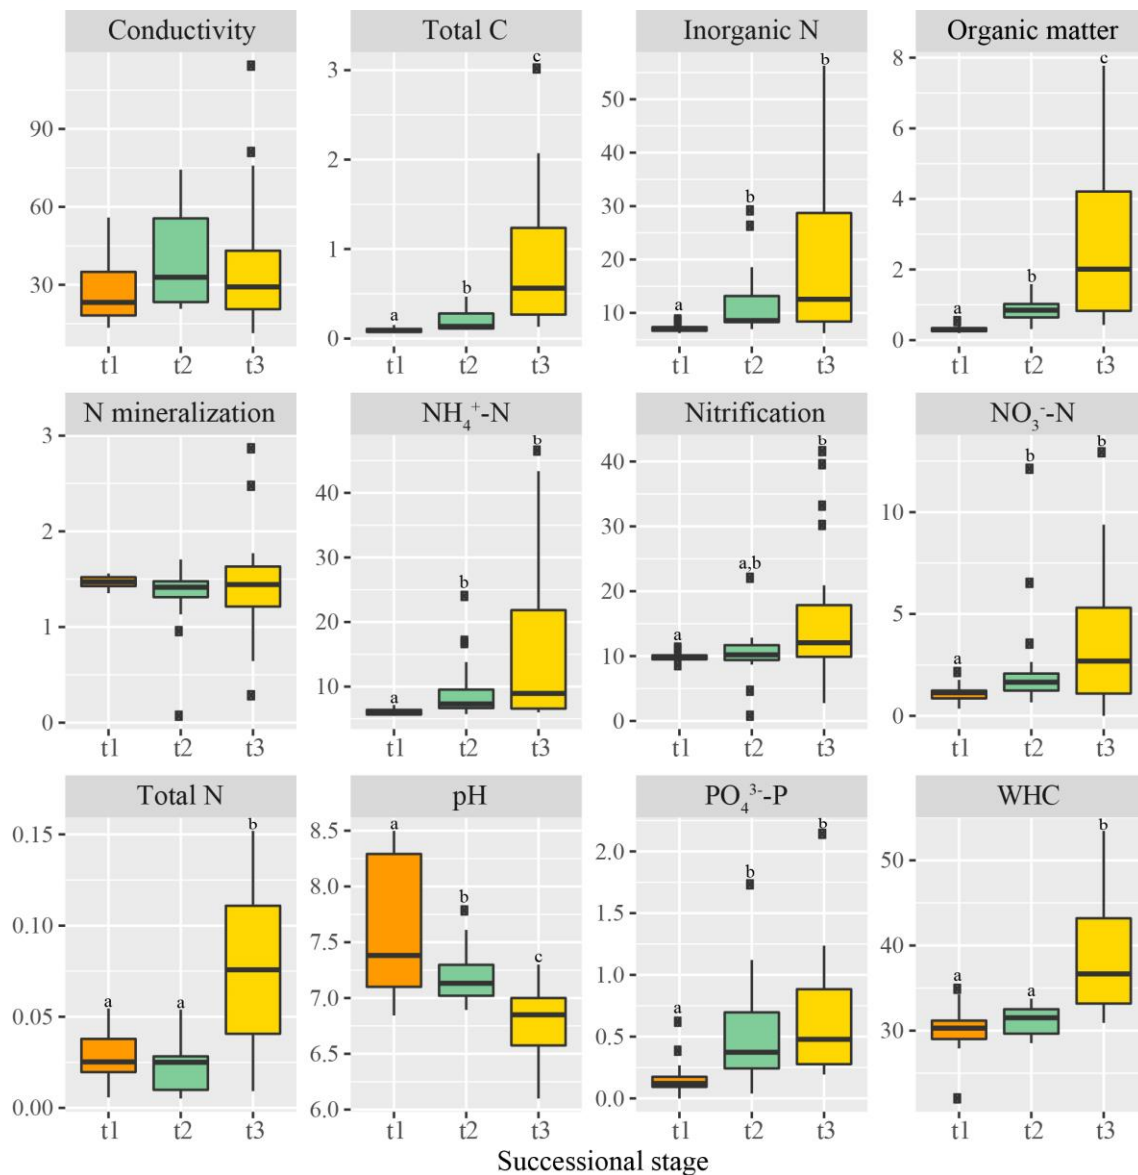

**Supplementary Figure S15.** Boxplots depicting basic summary data for the 12 soil variables analysed in the present study. Different letters indicate significant differences between successional stages ( $P < 0.05$ ). Variables  $\text{PO}_4^{3-}\text{-P}$ , N mineralization, Nitrification were transformed first to avoid negative values in the data matrix. Supplementary Table S1 contains original and transformed data.
